# Supplementary material for: Evaluating environmental, economic, and social aspects of an intensive pig production farm in the south of Brazil: a case study
Source: Springer Nature journal article supplement (doi:10.1007/s11367-023-02223-4), 2023-09-14
Supplement: MOESM1 [file 26045118]

*Supplementary Information*

***SI1 – Goal and Scope of the study***

*Goal of the study*

The aim of this study was to better understand and outline the impacts associated with intensive pig production by studying a typical farm located in the state of Santa Catarina, in the south of Brazil. The main goal was to identify weaknesses (hot spots) of the pig production life cycle by assessing the environmental, economic, and social aspects of this system, using Life Cycle Sustainability Assessment (LCSA).

The Environmental Performance of the pig production system (E-LCA) was based on the methodology set out by the ISO 14040 standards. The Economic Dimension (LCC) meanwhile, followed the method proposed by Hunkeler et al. 2008 - Environmental Life-Cycle Costing. Finally, the Social Aspect of this study applied the techniques presented by The Guidelines for Social Life Cycle Assessment of Product (UNEP/SETAC, 2009) and Chen & Holden (2017).

The structure of the LCSA was based on Neugebauer et al, 2015 and Chen and Holden, 2018, which proposed a tiered LCSA framework. The concept is the application of a Three-Tiered approach: starting with Tier I – an entry level LCSA; progressing to Tier II, which requires more details and comprehensive specification; and finishing with Tier III, where the uncertainties are reduced in relation to Tiers I and II, by increasing data quality and the number of indicators. The overall structure follows ISO 14040 standards.

The reasons for carrying out this LCSA include:

- The widespread intensification of pig production in Brazil in recent decades, which has led to substantial impacts in regions where pig farms are located. These environmental, social and economic consequences need to be better identified and evaluated.

- By identifying hotspots in the pig production system, opportunities to improve and reduce environmental, social and economic impacts at farm level can also be identified and studied.

- More than 90 % of the 100,000 farms in Santa Catarina are family farms (Exterckoter et al. 2015). Many would argue that they play a positive role in the life of the State. A greater awareness of sustainability performance can play a fundamental role in safeguarding family farms’ long-term survival.

LCSA approaches have become a tool used worldwide to achieve future sustainability. However, no LCSA study has yet been published in Brazil for pig production. This study can hopefully represent a first step in addressing this.

One of the main target audiences of this study is the farmer, who wishes to obtain financial, social and environmental performance measures related to his on-farm pig production systems and, thus, to pursue innovative and sustainable business strategies. In addition to the farmer, other stakeholders in the pig sector (feed producers, piglet production units, etc.) could also use this LCSA to seek a better understanding of the sustainability performance of products in their production processes.

A second potential audience for this study is LSCA practitioners (environmental, social and economic specialists) or organizations (e.g., EMBRAPA Pig and Poultry), whether related to the pig sector or not, who aim to build a comprehensive tool for evaluating the three classical pillars of sustainability in an integrated way.

The results of this study are not intended to be used in comparative assertions for disclosed to the public.

*Scope of the study*

The scope of this case study is to develop a cradle-to-farm-gate Life Cycle Sustainability Assessment of a relatively large pig production facility on a relatively modest family-owned farm. The farm is located in a rural area in the western region of the State of Santa Catarina, in the South of Brazil.

*System Boundary*

The environmental (E-LCA) evaluated system includes crop production (maize and soybeans), grain drying and cleaning processes, feed production at the feed factory, growing-to-finishing pig production, and manure management and spreading on surrounding land. Piglet production, transport and energy used in all processes were also included in the system. The system boundary for the economic and social aspects of the pig production is restricted to the farm activities of growing-to-finishing pigs and manure management, including land spreading.

*Functional Unit*

The system boundary includes all the main inputs and outputs required to produce 1kg of pig liveweight (Functional Unit) at the farm gate, ready to be transported to the abattoir.

*Impact Category*

The LCSA can be used to assess a wide range of Environmental, Economic and Social Impacts. Table S1 below summarizes the impact categories chosen in this study, as well as the corresponding indicators.

***Table S1-*** Environmental, Economical, and Social Impact Categories, respective units, divided by the Functional Unit - 1 kg of pig Liveweight (LW) at the farm gate.

| **Environmental Impact Categories** | **Unit** |  |
| --- | --- | --- |
|  |
| Global Warming | Kg CO2 eq./kg-LW |  |
| Acidification | g SO2-Eq./kg- LW |  |
| Eutrophication | g PO4 -3 eq./kg-LW |  |
| **Economic Impact Categories** | **Unit** |  |
|  |
| Production Cost | USS/kg-LW |  |
| Profitability | US$/kg-LW |  |
| Labour Productivity | second/kg-LW |  |
| **Social Impact Categories** | **Unit** |  |
|  |
| Fair Wage | US$/Month |  |
| Farm Income | US$/Month |  |
| Working hours per year | hours/year |  |
| Education Level | N/A |  |
| Age Structure | N/A |  |

*Data and Data Quality Requirements*

Site-specific data (primary data) for foreground processes (growing-to-finishing pig production) was provided by the Integrating Company (records) and by the case study farmer. Figures reflected the production process for the year 2015. The social assessment of the pig production systems included quantitative (T), and qualitative (L) data, supplied by the farmer. The economic assessment was based on budgets for the farm growing to finishing of 6308 pigs, which included the production costs (energy, funeral, investment depreciation, labour costs, etc) and the respective revenue from sales of the finishing pigs.

Variables and parameters used to calculate the environmental emissions of the manure management were gathered from Brazilian peer-reviewed literature and national statistical databases, and local conditions relevant to manure management were considered.

Background data for upstream processes (eg. Crop Production) have been sourced from Brazilian peer-reviewed literature, specific for the southern region of Brazil, as well as grain processing. In addition, the piglet production system was considered a background operation, and Brazilian statistical databases were used in this case. As for the energy mixes, data from the Gabi database were adapted to the specific energy mixes of Santa Catarina State.

Overall, the most recent data available was used, mainly from the period 2002 to 2018.

*Assumptions and Limitations*

A few assumptions were made related to the Feed Ingredients:

• The premix (mix of minerals and vitamins), which represents less than 1.5% the total feed mass, was assumed to contain mainly limestone flour and have the same impact.

• Meat and bone meal product was assumed to come from poultry carcass rendering processes.

• Piglets feed composition was assumed to contain the same ingredients used to feed the growing and finishing pigs.

• The distance between the meat and bone meal factory, salt extraction process plant, and limestone flour factory was assumed to be 200 km, 450 km, and 320 km respectively.

Production units playing a minor role in production processes, eg chemicals and buildings, were not included in the study. This is in line with widely accepted recommendations by the British Standard Institution (2008).

The environmental impacts of the production of medicine, packaging and machines were also excluded since no data was found.

*Allocation Procedure*

The Environmental assessment (E-LCA) included both the foreground and background processes of the study, thus allocation is required for soybean production, since this process also results in the co-production of soy oil. Economic criteria were adopted in this case, using extraction rates of the co-product (soy oil) and Brazilian market prices for 2014. This is in accordance with FAO (2017) guidelines which state “economic allocation is the dominant strategy for co product allocation adopted in LCA studies of pig systems in the animal feed supply chain”.

To avoid co-product allocation of manure, emissions from land spreading were evaluated using system expansion, as described by Nguyen et al. (2010). The reduction in manufacture of inorganic fertilizers as a result of the manure application approach was adopted, by using a mineral fertilizer equivalent (MFE%). It was assumed that the MFE was 75% of total N and 100% for P in manure (Nguyen et al. 2010), which was assigned to the crop production. The remaining emissions were assigned to the pig production system, as were all emissions associated with manure management before field application.

***SI2 - Life Cycle Inventory***

**Environmental LCI**

The first step taken was to identify all resources and energy flows involved in the pig production system. For the analysis, MS Excel software was used, and all data required to build the model was gathered, from crop production to data on finishing pigs at the farm gate.

*Crop Production*

Secondary data was gathered for crop production (maize and soybean crops) from peer-reviewed literature (ELCA studies), considering its geographical, temporal, and technical relevance. According to the integrating company, in 2014/2015, maize and soybean were purchased from the Southern Brazilian state of Parana to produce the pigs’ concentrated feed.

The data inputs and outputs to produce soybean was therefore collected from Prudêncio da Silva et al. (2010), considering that 100% of the grains dealt with in that work also came from the South of Brazil. A 50 Km distance from the agricultural farm to the Drying and Cleaning Facilities was assumed, and from there a 545 Km distance to the Feed Factory in Santa Catarina state.

For maize production, secondary data was gathered from Prudêncio et al. (2014), who performed an LCA study of broiler chicken production, including inputs related to maize production in the south of Brazil. A 30 Km distance from the agricultural farm to the Drying and Cleaning Facilities was assumed, and from there a 345 Km distance to the Feed Factory in Santa Catarina state.

The next stage of crop production includes pre-cleaning, drying, cleaning and storage. According to Marques (2006), heat for grain drying comes mainly from wood burning (279 MJ per ton of grain), while electricity is mainly used for the cleaning process (3.22 MJ per ton of grain). The electricity mix from Santa Catarina was obtained from the CELESC (Electricity Company of Santa Catarina) website, which states that the mix is composed of 73% hydropower, 9% oil, 8% natural gas, 4% coal, and 6% renewable energy. The electricity mix model was built using the Gabi database as a source for processes and emissions.

*Feed Production*

The feedstuff composition was provided by the integrating company. It consists of a combination of maize, soybean meal, soybean oil, meat and bone meal, salt and premix minerals plus vitamins. The percentage of each ingredient is presented in table S2, specifically for the growing and finishing pigs stage. The Feed Company is in the west of Santa Catarina State. The electricity used to process the concentrated feed is from CELESC, specified previously. Manufacturing one ton of concentrated feed (including packaging) uses 30kwh of electricity (Pacheco et al. 2018). The premix (mix of minerals and vitamins) emissions were gathered from Prudencio et al. (2014).

A few assumptions were made related to the Feed Ingredients:

• Meat and bone meal product was assumed to come from a poultry carcass rendering process. Air and water emissions were obtained from Silva (2014).

• Piglet feed composition was assumed to contain the same ingredients used to feed the growing and finishing pigs.

• The Gabi database was used as a source of emissions from the production of salt.

The distance between the meat and bone meal factory, salt extraction process plant, and premix factory was assumed to be 200 km, 450 km, and 320 km respectively.

***Table S2-*** *Ingredients (%) of the growing and finishing pig concentrated feed.*

| **INGREDIENTS** | **AVERAGE %** |
| --- | --- |
| Maize | 72% |
| Soybean Meal | 22% |
| Meat and Bone Meal | 2.5% |
| Soybeans Oil | 1.8% |
| Salt | 0.35% |
| Premix Vitamin and Mineral | 1.35% |

*Growing to Finishing Pig Production System*

The inventory of all materials, energy resource inputs, outputs (including products, co-products and emissions) for the pig production system was compiled, using recorded data provided by the integrating company and the case study farmer Table S3.

Table S3. Foreground data (primary data) of the growing to finishing pig production unit in 2015. Water consumption for animal drinking and cleaning were not measured on the farm, thus secondary data was used in this case.

| **Growing to Finishing (GF)** | **Quant.** | **Unit** | **Source** |
| --- | --- | --- | --- |
| No. of housing pigs | 6308 | pigs | Primary |
| Final fattening weight | 129.65 | kg | Primary |
| Daily weight gain | 0.978 | kg | Primary |
| Feed conversion rate | 2.40 | kg | Primary |
| Animal losses | 112 | pigs | Primary |
| Slaughter age | 171.35 | days | Primary |
| Mortality rates | 1.74 | % | Primary |
| Feed consumption | 2.35 | kg/pig/day | Primary |
| Housing period | 111.62 | days | Primary |
| Slurry | 4.50 | I/day/pig | Primary |
| Electricity | 302.31 | Kwh/month | Primary |
| Water consumption | 8 | l/day/pig | Ministério da Agricultura et al. 2016 |

Table S4 shows the input and output data for the growing to finishing stage of pig production, including emissions, to produce 1 kg of liveweight at the farm gate.

Table S4 Input and output data, including emissions, for the growing to finishing pig production per 1kg of pig live weight (Functional Unit) at the farm gate, ready to be transported to the abattoir.

| **Inputs/Outputs** | **Amount** | **Unit** | **Data sources** |
| --- | --- | --- | --- |
| *Input* | | | |
| Piglet weight | 1.60E-01 | kg | Primary data |
| Swine Feed consumption | 2.02E+00 | kg | Primary data |
| Water Consumption | 5.26E-03 | m3 | Ministério da Agricultura et al. 2016 |
| Electricity | 4.81E-03 | Kwh | Primary data |
| *Output* | | | |
| Swine liveweight | 1.00E+00 | kg | Primary data |
| Manure | 3.89E-03 | m3 | Primary data |
| *Emissions to air* | | | |
| CH4 (enteric fermentation) | 2.37E-03 | kg | Tier 1- IPCC. 2006a |
| NH3 (animal housing) | 4.12E-03 | kg | Hutchings et al. (2013) |
| CH4 (manure in storage) | 1.54E-02 | kg | Lima et al. 2010 |
| NH3 (manure in storage) | 1.18E-03 | kg | Hutchings et al. (2013) |
| N2O (manure in storage) | 2.30E-05 | kg | Tier 1- IPCC. 2006a |
| NH3 (manure spreading) | 3.26E-03 | kg | Hutchings et al. (2013) |
| N2O (manure spreading) | 2.88E-04 | kg | Hutchings et al. (2013) |
| N2 (manure spreading) | 5.46E-04 | kg | Hutchings et al. (2013) |
| NO (manure spreading) | 6.02E-05 | kg | Nemecek and Kägi (2007) |
| *Emissions to water* | | | |
| NO3 (leaching) | 5.29E-03 | kg | Hutchings et al. (2013) |
| P (leaching) | 1.61E-03 | kg | Hutchings et al. (2013) |
| *Avoided Emissions Production of Commercial Fertiliser* | | | |
| NH3 (avoid fertilizer production) | 9.53E-06 | kg | Ecoinvent (Calcium ammonium nitrate and Diammonium phosphate) |
| P (leaching) | 6.41E-07 | kg | Ecoinvent (Diammonium phosphate) |

For piglet production, mainly secondary data was collected, since primary data was not available. The Piglet Production is a background processes for the growing and finishing pig production. The emissions related to piglets included: emissions from housing and feeding lactating and gestating sows, the contribution of the boars, and the rearing of the piglet up to 20 Kg. on average. Table S5 presents the background inventory data used for modelling piglet production. A 30 km distance from the piglet farm to the growing and finishing piggery was assumed, as well as a 20 km distance for the transport of sows and boars to the piglet unit. It is further assumed that the supply of concentrated feed, for both piglet and growing to finishing pig units, is provided by the integrating company. A 30km distance the Feed Factory to the farms is also assumed. The input and output data per kg of liveweight, as well as emissions, are presented in table S6.

Table S5 - Background data (secondary data) of the Piglet Production System.

| **Piglet Production (PP)** | **Quant.** | **Unit** | **Source** |
| --- | --- | --- | --- |
| Weaned piglet per sow per year | 20 | piglet sow/year | EMBRAPA (2018) |
| Sow weight | 130 | kg | EMBRAPA (2018) |
| Feed per sow | 1058.5 | kg/year | EMBRAPA (2018) |
| Feed per boar | 89.6 | kg/year | EMBRAPA (2018) |
| Gestation sow | 114 | days | Cherubini et al (2015) |
| Dry sow | 7 | days | Cherubini et al (2015) |
| Lactating sow | 21 | days | Cherubini et al (2015) |
| Productive life | 2.5 | years | Cherubini et al (2015) |
| Sow replacement | 37.5 | % | Cherubini et al (2015) |
| Sow liveweight for slaughtering | 220 | kg | Cherubini et al (2015) |
| Weaning mortality | 1.4 | % | Cherubini et al (2015) |
| Feed conversion rate | 1.5 | kg | Cherubini et al (2015) |
| Feed 5 to 10kg piglet | 0.5 | kg/day | EMBRAPA (2018) |
| Feed 10 to 20 kg | 1.0 | kg/day | EMBRAPA (2018) |
| Piglets exit liveweight | 20.4 | kg | Primary |
| Piglets exit age | 60.0 | days | Primary |
| Water Consumption Piglets | 1.5 -2 | I/day | Ministério da Agricultura et al. 2016 |
| Water Consumption Lactating sows | 30-40 | I/day | Ministério da Agricultura et al. 2016 |
| Water Consumption Gestation sows | 15- 20 | I/day | Ministério da Agricultura et al. 2016 |
| Electricity | 10.2 | KWh/piglet  (60 days) | Ministério da Agricultura et al. 2016 |

Table S6 Input and output data per 1kg of pig liveweight (Functional Unit) of the Piglet Production System.

| **Inputs/Outputs** | **Amount** | **Unit** | **Data sources** |
| --- | --- | --- | --- |
| *Input* | | | |
| Sow weight | 5.18E-02 | kg | EMBRAPA (2018) |
| Boar weight | 4.40E-03 | kg | EMBRAPA (2018) |
| Feed sow | 4.22E-01 | kg | EMBRAPA (2018) |
| Feed boar | 1.97E-03 | kg | EMBRAPA (2018) |
| Feed piglets | 2.16E-01 | kg | EMBRAPA (2018) |
| Drinking water | 2.16E-03 | m3 | Ministério da Agricultura et al. 2016 |
| Electricity | 8.01E-02 | Kwh | Ministério da Agricultura et al. 2016 |
| *Output* | | | |
| Piglet 60 days | 1.60E-01 | kg | Primary data |
| Manure | 1.97E-03 | m3 | Oliveira (1993) |
| *Emissions to air* | | | |
| CH4 (enteric fermentation) | 7.90E-04 | kg | Tier 1- IPCC. 2006a |
| NH3 (animal housing) | 2.08E-03 | kg | Hutchings et al. (2013) |
| CH4 (manure in storage) | 5.13E-03 | kg | Lima et al. 2010 |
| NH3 (manure in storage) | 5.98E-04 | kg | Hutchings et al. (2013) |
| N2O (manure in storage) | 1.02E-05 | kg | Tier 1- IPCC. 2006a |
| NH3 (manure spreading) | 1.65E-03 | kg | Hutchings et al. (2013) |
| N2O (manure spreading) | 1.99E-04 | kg | Hutchings et al. (2013) |
| N2 (manure spreading) | 2.76E-04 | kg | Hutchings et al. (2013) |
| NO (manure spreading) | 3.06E-05 | kg | Nemecek and Kägi (2007) |
| *Emissions to water* | | | |
| NO3 (leaching) | 2.67E-03 | kg | Hutchings et al. (2013) |
| P (leaching) | 8.19E-04 | kg | Hutchings et al. (2013) |
| *Avoided Emissions Production of Commercial Fertiliser* | | | |
| NH3 (avoid fertilizer production) | 4.81E-06 | kg | Ecoinvent (Calcium ammonium nitrate and Diammonium phosphate) |
| P (leaching) | 3.24E-07 | kg | Ecoinvent (Diammonium phosphate) |

*Manure Management*

It was assumed that the same manure management is used in piglet and the growing to finishing pig units. The typical manure management practice is storage in open tanks followed by land application. International Panel on Climate Change Methodology (IPCC. 2006) figures were used to calculate N2O (nitrous oxide), using the emission factor of 6.5 kg CH4/pig/year (tier II) related to intensive pig farms in Santa Catarina (Fatma.sc.gov.br. 2018). Other emissions to air such as CH4 and NH3 from manure storage, and NH3, N2O, N2 and NO from manure land spreading; as well as emissions to water: such as NO3 leaching and P leaching; were estimated using the emission factors and methods presented by Cherubini et al. (2015).

To avoid co-product allocation of manure, emissions related to land spreading were evaluated using system expansion, as described by Nguyen et al. (2010). Thus, the reduction in manufacture of inorganic fertilizers approaches was adopted as a result of manure application, by using a mineral fertilizer equivalent (MFE%). It was assumed that the MFE was 75% of total N and 100% for P in manure (Nguyen et al. 2010), which was assigned to the crop production. The remaining emissions were assigned to the pig production system, as well as all the emissions associated with manure management before field application.

**Economic LCI**

Production costs are based on budgets for the fattening of 6308 pigs in 2015, calculated from recorded data provided by the farmer. The budgets included: labour costs, slurry costs (cost associated with renting land and slurry land spreading), electricity costs, funeral costs, finance costs, investment, depreciation and maintenance costs. Water cost was not included, since the farmer uses spring water located on the farm as a water supply. Labour costs included wages, payroll taxes and social security costs for one employee. The integrating company makes payments every 4 months, based on quality and quantities of the product (conversion rates, mortality rates. and finished pig weights). The total revenue from the fattening pigs for 2015 was collected from the integrating company and cross-checked with the farmer appointments.

**Social LCI**

Data used for the social evaluation aspect of the pig production system focuses on the farm level. It was obtained through semi-structured interviews with the head of the case study farm. These semi-structured interviews were formulated based on inventory indicators and social hotspots found during the literature review. The data gathered covers a broad range of information such as: farm size, use of technology, technical assistance, health and safety, source of income, working hours, employment, family members age, time dedicated to the pig production, length of time the farmer has been working with pig production, among others. After analysing the data set against recommendations and discussions on social aspect indicators found in the literature review, five social indicators were selected for this study, considering the validity, relevance, measurement methods, and completeness of the data required for each indicator chosen. Table S7 show the social indicators qualitative data, subcategories, score and reference sources.

*Table S7. Qualitative social indicators, indicators subcategories, and respective score, including the sources from which the subcategories were based.*

| ***Qualitative*** | | | | |
| --- | --- | --- | --- | --- |
| ***Stakeholders Categories*** | ***Impact Categories*** | ***Score*** | ***Subcategories*** | ***Data Source*** |
| *Farmer* | *Education Level* | *0* | *Illiterate* | *IBGE - Censo Agro 2017 (2018) Family Farmers education level - West Santa Catarina* |
| *20* | *Literate* |
| *40* | *Literate 1 to2 years of school* |
| *50* | *Primary School initiated (average 4 years of school)* |
| *60* | *Primary School Concluded* |
| *80* | *Secondary School* |
| *100* | *University degree or post-graduation* |
| *Age Range* | *0* | *65+ years old* | *IBGE - Censo Agro 2017 (2018)  Family Farmers Age Group- west Santa Catarina* |
| *20* | *63 to 65 years old* |
| *40* | *60 to 63 years old* |
| *50* | *60 years old* |
| *60* | *45 to 60 years old* |
| *80* | *35 - 45 years old* |
| *100* | *18 - 35 years old* |

*References*

Chen W, Holden NM (2017) Social life cycle assessment of average Irish dairy farm. Int J Life Cycle Assess 22:1459–1472. <https://doi.org/10.1007/s11367-016-1250-2>

Chen W, Holden NM (2018) Tiered life cycle sustainability assessment applied to a grazing dairy farm. J Clean Prod 172:1169–1179. <https://doi.org/10.1016/j.jclepro.2017.10.264>

Cherubini E. Zanghelini GM. Alvarenga RAF. et al (2015) Life cycle assessment of swine production in Brazil: a comparison of four manure management systems. J Clean Prod 87:68–77. <https://doi.org/10.1016/j.jclepro.2014.10.035>

Embrapa (2018) Custos do suíno por UF. <https://www.embrapa.br/suinos-e-aves/cias/custos/suino-uf>. Accessed 31 Dec 2022

Exterckoter, R.K., da Silva, C.A. and Pujol, A.F.T. (2015) Family farmers as agents of resilience in the western region of Santa Catarina (Brazil). Ager: revista de estudios sobre despoblacion y desarrollo rural, 18: 115-125. <https://scholar.google.com/scholar?hl=en&as_sdt=0%2C5&q=Family+farmers+as+agents+of+resilience+in+the+western+region+of+Santa+Catarina+%28Brazil%29.+&btnG=>. Accessed 15 Jun 2023

FAO (2017) Environmental Performance of Pig Supply Chains: Guidelines for assessment Livestock Environmental. Assessment and Performance Partnership. FAO, Rome, Italy. <https://www.fao.org/documents/card/en/c/ade1db9b-1b03-4ddd-be50-8808d7132904/>. Accessed 02 Jun 2023

Hutchings, N.J., ten Hoeve, M., Jensen, R., Bruun, S., Søtoft, L.F. (2013) Modelling the potential of slurry management technologies to reduce the constraints of environmental legislation on pig production. J. Environ. Manage. 130, 447-456. <http://dx.doi.org/10.1016/j.jenvman.2013.08.063>

IBGE (2017) Resultados do Censo Agro 2017. <https://censoagro2017.ibge.gov.br/templates/censo_agro/resultadosagro/index.html>. Accessed 25 Jul 2023

Lima, M. A. de; Pessoa, M. C. P. Y.; Neves, M. C.; Carvalho, E. C. de (2010) Emissões de metano por fermentação entérica e manejo de dejetos de animais. 1st ed. Brasília, DF: Ministério da Ciência e Tecnologia, 120. <https://www.alice.cnptia.embrapa.br/alice/bitstream/doc/921485/1/2011MZ02.pdf>. Accessed 02 Jun 2023

Marques BDA (2006) Considerações ambientais e exergéticas na fase de pós-colheita de grãos: Estudo de caso do Estado do Paraná. PhD Diss Univ Fed do Paraná. Curitiba. Brazil. <https://scholar.google.com/scholar?hl=en&as_sdt=0%2C5&q=Considera%C3%A7%C3%B5es+ambientais+e+exerg%C3%A9ticas+na+fase+de+p%C3%B3s-colheita+de+gr%C3%A3os%3A+Estudo+de+caso+do+Estado+do+Paran%C3%A1&btnG=>. Accessed 25 Jul 2023

Ministério da Agricultura. P.e A.(B.. Instituto Interamericano de Cooperación para la Agricultura (IICA) and Empresa Brasileira de Pesquisa Agropecuaria. B.D.F. (2016) Suinocultura de Baixa Emissão de Carbono : Tecnologias de produção mais limpa E Aproveitamento Econômico dos Resíduos da Produção de Suínos. Home. Available at: [https://repositorio.iica.int/handle/11324/3106](https://repositorio.iica.int/handle/11324/3106%20) Accessed 28 Feb 2023

Nemecek, T., Kagi, T., 2007. Life Cycle Inventories of Swiss and European Agricultural Systems. Final report Ecoinvent v2.0 No. 15a. Agroscope Reckenholz- Taenikon Research Station ART, Swiss Centre for Life Cycle Inventories, Zurich and Dübendorf, CH [online] Available from: <https://db.ecoinvent.org/reports/15_Agriculture.pdf>. Accessed 22 Feb 2023

Neugebauer S, Martinez-Blanco J, Scheumann R, Finkbeiner M (2015) Enhancing the practical implementation of life cycle sustainability assessment – proposal of a Tiered approach. J Clean Prod 102:165–176. <https://doi.org/10.1016/j.jclepro.2015.04.053>

Nguyen TLT. Hermansen JE. Mogensen L (2010) Fossil energy and GHG saving potentials of pig farming in the EU. Energy Policy 38:2561–2571. <https://doi.org/10.1016/j.enpol.2009.12.051>

Oliveira P.A.V (1993). Manual de manejo e utilização dos dejetos de suínos. EMBRAPA-CNPSA. Documentos. 27, 88. <https://www.embrapa.br/en/busca-de-publicacoes/-/publicacao/434003/manual-de-manejo-e-utilizacao-dos-dejetos-de-suinos>. Accessed 27 Jan 2023

Pacheco J de C. Moita Neto JM. Silva EA da (2018) Desempenho ambiental da produção de ração para frango de corte no Piauí. Eng Sanit e Ambient 23:707–716. <https://doi.org/10.1590/s1413-41522018164653>

Prudêncio da Silva V. van der Werf HMG. Soares SR. Corson MS (2014) Environmental impacts of French and Brazilian broiler chicken production scenarios: An LCA approach. J Environ Manage 133:222–231. <https://doi.org/10.1016/j.jenvman.2013.12.011>

Prudêncio da Silva V. van der Werf HMG. Spies A. Soares SR (2010) Variability in environmental impacts of Brazilian soybean according to crop production and transport scenarios. J Environ Manage 91:1831–1839. <https://doi.org/10.1016/j.jenvman.2010.04.001>

Silva, C. (2014) Avaliação do Ciclo de Vida (ACV) de ingredientes aquícolas. Mestrado em Ciências do Mar, Recursos Marinhos, especialização em Aquacultura e Pesca. Universidade do Porto. <https://scholar.google.com/scholar?hl=en&as_sdt=0%2C5&q=Avalia%C3%A7%C3%A3o+do+Ciclo+de+Vida+%28ACV%29+de+ingredientes+aqu%C3%ADcolas.+Mestrado+em+Ci%C3%AAncias+do+Mar%2C+Recursos+Marinhos%2C+especializa%C3%A7%C3%A3o+em+Aquacultura+e+Pesca&btnG=>. Accessed 20 Jan 2023

UNEP/SETAC (2009) Guidelines for social life cycle assessment of products | UNEP - UN Environment Programme. UNEP/SETAC. <https://www.unep.org/resources/report/guidelines-social-life-cycle-assessment-products>. Accessed 31 Dec 2022
